# Supplementary material
Source: publisher site journal article supplement (https://www.dovepress.com/article/252377)
Supplement: Supplementary file 1 [file get_supplementary_file.php]

**Supplementary Table 1.** Patients' peri-operative characteristics of the pooled dexamethasone and lidocaine groups.

|                                                    | Pooled dexamethasone groups  |                              |                              | Pooled lidocaine groups      |                              |
|----------------------------------------------------|------------------------------|------------------------------|------------------------------|------------------------------|------------------------------|
|                                                    | No Dexa<br>n = 16            | Dexa 4 mg<br>n = 16          | Dexa 8 mg<br>n = 16          | Placebo<br>n = 24            | Lidocaine<br>n = 24          |
| Age (yr)                                           | 57 (12) [34–75]              | 58 (10) [43–75]              | 58 (10) [47–80]              | 57 (11) [34–75]              | 58 (10) [42–80]              |
| BMI (kg m <sup>-2</sup> )                          | 27 (5) [20–36]               | 24 (4) [19–33]               | 25 (4) [21–35]               | 25 (4) [20–35]               | 25 (5) [19–36]               |
| ASA physical status (n)                            |                              |                              |                              |                              |                              |
| 1                                                  | 6                            | 9                            | 10                           | 10                           | 15                           |
| 2                                                  | 10                           | 7                            | 6                            | 14                           | 9                            |
| Tumour classification (n)                          |                              |                              |                              |                              |                              |
| Carcinoma In situ                                  | 4                            | 3                            | 2                            | 5                            | 4                            |
| T1                                                 | 9                            | 9                            | 11                           | 15                           | 14                           |
| T2                                                 | 3                            | 4                            | 3                            | 4                            | 6                            |
| Node classification (n)                            |                              |                              |                              |                              |                              |
| N0                                                 | 15                           | 13                           | 12                           | 19                           | 21                           |
| N1                                                 | 1                            | 3                            | 4                            | 5                            | 3                            |
| Surgery duration (min)                             | 98 (39) [35-156]             | 84 (29) [24-133]             | 66 (21) [36-109]             | 83 (33) [39-152]             | 82 (33) [24-156]             |
| Sufentanil (µg kg <sup>-1</sup> hr <sup>-1</sup> ) | 0.29 (0.12)<br>[0.13 – 0.54] | 0.28 (0.12)<br>[0.12 – 0.60] | 0.30 (0.12)<br>[0.11 – 0.52] | 0.31 (0.09)<br>[0.17 – 0.45] | 0.27 (0.14)<br>[0.11 – 0.60] |
| NRS                                                |                              |                              |                              |                              |                              |
| at t0                                              | 0.5 (0.9) [0 - 3]            | 0.5 (1.0) [0 - 4]            | 0.2 (0.8) [0 - 3]            | 0.4 (0.8) [0 - 3]            | 0.4 (1.0) [0 - 4]            |
| at t1                                              | 1.6 (1.8) [0 - 5]            | 1.3 (1.6) [0 - 5]            | 0.9 (1.7) [0 - 6]            | 1.5 (1.9) [0 - 6]            | 1.0 (1.4) [0 - 4]            |
| at t2                                              | 2.1 (1.9) [0 - 7]            | 2.0 (1.4) [0 - 6]            | 2.5 (1.0) [0 - 4]            | 2.3 (1.5) [0 - 7]            | 2.0 (1.4) [0 - 6]            |
| Diclofenac (n)                                     |                              |                              |                              |                              |                              |
| 0 mg                                               | 1                            | 1                            | 1                            | 2                            | 1                            |
| 75 mg                                              | 12                           | 14                           | 15                           | 21                           | 20                           |
| 125 mg                                             | 3                            | 1                            | 0                            | 1                            | 3                            |
| Pirtramide (mg)                                    | 8.9 (5.8) [0-20]             | 8.6 (5.4) [0-20]             | 9.7 (3.9) [5-20]             | 9.3 (4.7) [0-20]             | 8.9 (5.4) [0-20]             |
| Clonidine (n)                                      |                              |                              |                              |                              |                              |
| 0 µg                                               | 11                           | 14                           | 16                           | 21                           | 20                           |
| 75 µg                                              | 3                            | 2                            | 0                            | 2                            | 3                            |
| 150 µg                                             | 2                            | 0                            | 0                            | 1                            | 1                            |
| 30-day complications (N)                           |                              |                              |                              |                              |                              |
| CDC I                                              | 4                            | 9                            | 3                            | 10                           | 6                            |
| CDC II                                             | 1                            | 1                            | 2                            | 0                            | 4                            |
| CDC IIIb                                           | 1                            | 0                            | 1                            | 1                            | 1                            |

**Notes:** Data are mean (SD) [minimum - maximum], number of patients (n) or number of complications (N). At t0 = baseline, t1 = direct postoperative, and t2 = 4 hours after surgery.

**Abbreviations:** Dexa, dexamethasone; BMI, Body Mass Index; ASA, American Society of Anesthesiologists; T, tumor staging; NRS, Numeric Rating Scale; CDC, Clavien Dindo Classification.

**Supplementary Table S2:** Cytokine values at baseline and 4 hours postoperative.

|                               | RCT 1: No dexamethasone |                         | RCT 2: Dexamethasone 4 mg |                         | RCT 3: Dexamethasone 8 mg |                          |
|-------------------------------|-------------------------|-------------------------|---------------------------|-------------------------|---------------------------|--------------------------|
|                               | Placebo                 | Lidocaine               | Placebo                   | Lidocaine               | Placebo                   | Lidocaine                |
| <b>t0</b>                     |                         |                         |                           |                         |                           |                          |
| IL-6 (pg·mL <sup>-1</sup> )   | 2.28<br>[1.58 – 3.29]   | 2.10<br>[1.28 – 3.33]   | 2.66<br>[1.70 – 3.78]     | 2.01<br>[1.33 – 3.50]   | 1.76<br>[1.47 – 4.98]     | 1.92<br>[1.45 – 2.92]    |
| IL-10 (pg·mL <sup>-1</sup> )  | 2.88<br>[2.62 – 3.24]   | 2.53<br>[2.30 – 2.83]   | 2.70<br>[2.51 – 2.81]     | 2.77<br>[2.05 – 3.26]   | 2.94<br>[2.22 – 4.76]     | 2.53<br>[2.24 – 2.73]    |
| IL-6 to IL-10                 | 0.77<br>[0.60 – 1.08]   | 0.73<br>[0.51 – 1.30]   | 0.94<br>[0.62 – 1.39]     | 0.77<br>[0.48 – 1.20]   | 0.74<br>[0.51 – 0.94]     | 0.80<br>[0.55 – 1.27]    |
| IL-1β (pg·mL <sup>-1</sup> )  | 0.42<br>[0.33 – 0.56]   | 0.21<br>[0.14 – 0.45]   | 0.39<br>[0.32 – 0.70]     | 0.47<br>[0.36 – 0.56]   | 0.13<br>[0.11 – 0.20]     | 0.16<br>[0.10 – 0.21]    |
| IL-1RA (pg·mL <sup>-1</sup> ) | 282<br>[199 – 543]      | 302<br>[190 – 362]      | 225<br>[210 – 295]        | 246<br>[185 – 311]      | 247<br>[175 – 265]        | 278<br>[192 – 370]       |
| IL-1β to IL-1RA*              | 1.40<br>[0.88 – 2.03]   | 0.70<br>[0.60 – 2.50]   | 1.60<br>[1.25 – 3.10]     | 1.70<br>[1.43 – 2.68]   | 0.50<br>[0.43 – 0.78]     | 0.55<br>[0.43 – 0.85]    |
| <b>t2</b>                     |                         |                         |                           |                         |                           |                          |
| IL-6 (pg·mL <sup>-1</sup> )   | 23.57<br>[11.63 – 36.3] | 11.48<br>[7.58 – 17.22] | 9.63<br>[6.04 – 15.69]    | 14.61<br>[5.96 – 37.57] | 4.52<br>[2.02 – 15.88]    | 6.77<br>[4.43 – 15.39]   |
| IL-10 (pg·mL <sup>-1</sup> )  | 4.70<br>[2.52 – 5.90]   | 3.89<br>[2.70 – 4.85]   | 8.21<br>[6.02 – 10.47]    | 6.93<br>[4.81 – 11.10]  | 8.39<br>[6.67 – 11.74]    | 21.80<br>[10.55 – 28.05] |
| IL-6 to IL-10                 | 5.47<br>[3.74 – 6.96]   | 3.00<br>[2.51 – 3.92]   | 1.32<br>[0.73 – 1.93]     | 2.26<br>[1.06 – 3.60]   | 0.63<br>[0.20 – 1.40]     | 0.68<br>[0.25 – 0.88]    |
| IL-1β (pg·mL <sup>-1</sup> )  | 0.43<br>[0.26 – 1.98]   | 0.26<br>[0.19 – 0.49]   | 0.32<br>[0.26 – 0.49]     | 0.43<br>[0.26 – 0.48]   | 0.10<br>[0.06 – 0.13]     | 0.15<br>[0.08 – 0.88]    |
| IL-1Ra (pg·mL <sup>-1</sup> ) | 565<br>[231 -1570]      | 429<br>[306 - 554]      | 205<br>[177 - 221]        | 266<br>[218 - 423]      | 250<br>[175 - 337]        | 461<br>[287 - 1453]      |
| IL-1β to IL-1RA*              | 1.17<br>[0.68 – 2.07]   | 0.61<br>[0.38 – 1.09]   | 1.58<br>[1.22 – 2.36]     | 1.54<br>[0.62 – 2.16]   | 0.34<br>[0.15 – 0.71]     | 0.35<br>[0.20 – 0.52]    |

**Notes:** Data are median with interquartile range for each patient group (n=8 per group). At t0 = baseline, and t2 = 4 hours after surgery. \* Results for IL-1β/IL-1Ra are to be multiplied by 10<sup>-3</sup>.

**Abbreviations:** IL, Interleukin

**Supplementary Table S3:** Spearman's Rho correlation between postoperative pain score and cytokine values.

|    |                       | NRS at t2               |          |
|----|-----------------------|-------------------------|----------|
|    |                       | Rho (95% CI)            | <i>P</i> |
| t0 | IL-6                  | -0.041 (-0.329 – 0.254) | 0.783    |
|    | IL-10                 | -0.114 (-0.393 – 0.184) | 0.439    |
|    | IL-6 / IL-10          | 0.043 (-0.252 – 0.331)  | 0.771    |
|    | IL-1 $\beta$          | -0.175 (-0.444 – 0.124) | 0.235    |
|    | IL-1Ra                | 0.005 (-0.288 – 0.296)  | 0.975    |
|    | IL-1 $\beta$ / IL-1Ra | -0.170 (-0.440 – 0.128) | 0.248    |
| t2 | IL-6                  | 0.065 (-0.231 – 0.351)  | 0.658    |
|    | IL-10                 | 0.260 (-0.038 – 0.515)  | 0.078    |
|    | IL-6 / IL-10          | -0.120 (-0.400 – 0.182) | 0.423    |
|    | IL-1 $\beta$          | -0.041 (-0.329 – 0.254) | 0.781    |
|    | IL-1Ra                | 0.023 (-0.271 – 0.313)  | 0.877    |
|    | IL-1 $\beta$ / IL-1Ra | -0.167 (-0.434 – 0.131) | 0.257    |

**Notes:** At t0 = baseline, and t2 = 4 hours after surgery

**Abbreviations:** NRS, Numeric Rating Scale; IL, Interleukin
